# Supplementary material for: Machine Learning Approach for Subtype Prediction in Primary Aldosteronism: A Comprehensive Analysis of Models and Features
Source: Research Square preprint supplement (doi:10.21203/rs.3.rs-8268064/v1), 2025-12-15
Supplement: Supplementary file 1 [file 8c8e7d753da5b603046fbb26.xlsx]

## Sheet: Table1A
Category A: PA-related features in the outpatient setting		23 features
Aa	general status	5
Ab	circulatory system	4
Ac	renin-aldosterone system	3
Ad	electrolytes	6
Ae	24h urine	4
Af	tumor size	1
Category B: Challenge tests and diurnal profiles in the inpatient setting		47 features
Ba	daily profile of aldosterone	7
Bb	daily profile of cortisol	7
Bc	captopril challenge test (CCT)	6
Bd	furosemide upright test (FUT)	12
Be	ACTH stimulation test (AST)	15
Category C: General biochemical tests and blood counts		37 features
Ca	blood counts	13
Cb	hepatic function	4
Cc	renal function	2
Cd	lipid profile	3
Ce	glucose metabolism	8
Cf	others	4
Cg	24h urine others	3
Category D: Urinary steroid profile		89 features
Da	urinary metabolite	63
Db	total of metabolites	13
Dc	ratio of metabolite	13
	Total:	196 features

## Sheet: Table1B
Features	Category	p-value	bPA 50% (25-75%)	uPA 50% (25-75%)	n of samples
CCT90-PAC	B	1.74498e-19	122.00 (96.00-163.50)	239.00 (178.00-400.00)	274
PAC at 8:00	B	3.54973e-16	192.00 (153.00-256.50)	310.00 (239.50-484.50)	274
THAld	D	6.55483e-16	0.03 (0.02-0.05)	0.06 (0.04-0.12)	274
K	A	6.76115e-16	4.00 (3.70-4.30)	3.30 (2.90-3.80)	273
AST120-A/C ratio	B	1.87087e-15	7.34 (6.07-9.49)	14.31 (9.23-17.77)	225
18OHTHA	D	2.7922e-15	0.09 (0.07-0.13)	0.17 (0.11-0.31)	273
24h urinary Aldo	A	3.17875e-15	11.10 (8.50-14.60)	20.10 (12.10-32.40)	274
tumor size	A	1.71176e-14	3.00 (0.00-9.90)	13.00 (9.50-19.00)	274
AST60-A/C ratio	B	1.20329e-13	12.09 (8.98-16.06)	19.42 (15.14-28.12)	231
AST120-PAC	B	1.27394e-13	213.50 (164.75-271.75)	352.00 (276.00-490.00)	227
AST60-PAC	B	1.47938e-11	311.00 (237.00-427.00)	463.00 (382.50-720.50)	234
18OHF/(THE+THF)	D	1.509e-10	0.01 (0.01-0.02)	0.02 (0.01-0.03)	274
18OHF	D	2.63923e-09	0.05 (0.03-0.08)	0.09 (0.06-0.15)	273
AST30-A/C ratio	B	3.32558e-08	15.12 (12.05-20.32)	22.13 (16.49-28.79)	231
AST30-PAC	B	6.5517e-08	353.00 (287.50-451.00)	480.00 (380.50-697.00)	234
PAC at 16:00	B	6.79603e-08	167.00 (130.00-215.00)	236.50 (170.50-319.25)	267
24h Urinary K	A	1.93653e-07	43.60 (36.50-53.60)	53.80 (44.40-74.25)	274
ARR at 8:00	B	2.39554e-07	78.50 (53.71-123.49)	159.00 (90.31-357.31)	274
PAC at 24:00	B	2.40197e-07	110.00 (81.00-148.00)	166.00 (115.00-243.00)	267
A/C ratio at 8:00	B	4.09665e-07	14.20 (10.93-19.24)	24.71 (18.58-36.05)	274
IntactPTH	A	3.65963e-06	54.05 (42.00-73.00)	74.90 (61.50-101.62)	268
PAC at first visit	A	7.3068e-06	200.00 (152.20-263.90)	279.00 (211.00-372.50)	274
FUT60-PAC	B	7.43551e-06	277.00 (224.00-373.00)	359.50 (251.00-647.00)	167
THDOC	D	8.28254e-06	0.01 (0.00-0.01)	0.01 (0.01-0.02)	273
ARR at first visit	A	9.55243e-06	78.00 (50.89-128.00)	144.00 (73.82-229.50)	274
Na	A	3.23444e-05	141.90 (140.70-142.97)	143.00 (141.80-144.10)	269
FUT120-ARR	B	4.31595e-05	72.50 (43.46-123.33)	126.90 (71.43-368.25)	184
CCT90-ARR	B	4.60338e-05	51.63 (33.54-88.78)	127.27 (76.08-274.25)	274
FUT120-PAC	B	0.000121926	328.50 (231.25-417.50)	370.00 (269.00-700.00)	189
FUT60 FI-PAC	B	0.00109648	199.01 (158.15-258.09)	156.80 (133.96-215.53)	164
Ald	D	0.00178864	0.01 (0.01-0.01)	0.01 (0.01-0.03)	253
20αCor	D	0.00183579	0.28 (0.22-0.36)	0.31 (0.24-0.44)	274
FUT60-ARR	B	0.00237817	68.66 (45.40-108.56)	134.05 (68.80-304.38)	162
5βTHS	D	0.00290401	0.10 (0.07-0.15)	0.12 (0.08-0.19)	274
5βTHB	D	0.00294478	0.11 (0.08-0.16)	0.15 (0.10-0.19)	273
FUT120 FI-PAC	B	0.00298908	235.28 (170.02-298.50)	162.94 (139.37-227.32)	187
total B	D	0.00344543	0.46 (0.31-0.62)	0.59 (0.40-0.77)	273
CCT90 FI-ARR	B	0.00346234	64.73 (46.48-81.03)	86.08 (66.72-112.67)	274
total 11OHB	D	0.00356307	0.32 (0.23-0.44)	0.41 (0.30-0.53)	274
5αTHA	D	0.00358301	0.06 (0.04-0.08)	0.07 (0.05-0.10)	272

## Sheet: Table1C
ROC analysis	K	CCT90-PAC	MCV	THAld
ROC-AUC	0.788138	0.835735	0.576882	0.771892
Diagnostic Accuracy	0.710623	0.817518	0.70632	0.791971

## Sheet: Table2A
Predictive performance	Logistic Regression	Support Vector Machine	Random Forest	Gradient Boosting Decision Tree	Multilayer Perceptron
Test LogLoss	0.40551	0.297501	0.317607	0.283317	0.280482
Test ROC-AUC	0.919683	0.932127	0.971719	0.928733	0.926471
Test Predictive Accuracy	0.797101	0.869565	0.913043	0.884058	0.884058
Test Sensitivity / Specificity	0.471 / 0.904	0.471 / 1.000	0.765 / 0.962	0.647 / 0.962	0.765 / 0.923
Test bPA True / False	47 / 5	52 / 0	50 / 2	50 / 2	48 / 4
Test uPA False / True	9 / 8	9 / 8	4 / 13	6 / 11	4 / 13

## Sheet: Table2B
Prediction by Random Forest	Category A	Category B	Category C	Category D	Category A & B	Category A & C	Category A & D	Category all
Test LogLoss	0.331	0.356	0.552	0.43	0.297	0.452	0.345	0.318
Test ROC-AUC	0.917	0.943	0.645	0.855	0.96	0.813	0.907	0.972
Test Predictive Accuracy	0.855	0.928	0.783	0.884058	0.87	0.783	0.884	0.913
Test Sensitivity / Specificity	0.706 / 0.904	0.882 / 0.942	0.176 / 0.981	0.529 / 1.000	0.882 / 0.865	0.471 / 0.885	0.647 / 0.962	0.765 / 0.962
Test bPA True / False	47 / 5	49 / 3	51 / 1	52 / 0	45 / 7	46 / 6	50 / 2	50 / 2
Test uPA False / True	5 / 12	2 / 15	14 / 3	8 / 9	2 / 15	9 / 8	6 / 11	4 / 13

## Sheet: Table2C
Predictive contribution of each Category	Logistic Regression	Support Vector Machine	Random Forest	Gradient Boosting Decision Tree	Multilayer Perceptron
A: PA-related features	0.610774	0.206897	0.24691	0.14841	0.146063
B: challenge tests and daily profile	0.311211	0.448276	0.472595	0.396938	0.273868
C: general biochemical tests	0.0251938	0	0.0725612	0.0965842	0.179536
D: urinary steroid profile	0.0528213	0.344828	0.207933	0.358068	0.400533
Methods of evaluation	Regression coefficient	Permutation importance	Feature importance	Permutation importance	Permutation importance

## Sheet: Table2D
Category		Predictive contribution of each Subcategory	n of features	Logistic Regression	Support Vector Machine	Random Forest	Gradient Boosting Decision Tree	Multilayer Perceptron
A	a	general status	5	0.0078676	0	0.00284064	0.00117786	0.0220616
	b	circulatory system	4	0	0	0.0162166	0.0212014	0.035755
	c	renin-aldosterone system	3	0	0	0.0123699	0.0612485	0.0136934
	d	electrolytes	6	0.178435	0	0.0511068	0.0235571	0.025485
	e	24h urine	4	0	0	0.0194617	0.0235571	0.0289083
	f	tumor size	1	0.424471	0.206897	0.144915	0.0176678	0.0201598
B	a	daily profile of aldosterone	7	0	0.0689655	0.0343049	0.0282686	0.0600989
	b	daily profile of cortisol	7	0	0.0689655	0.0590735	0.0318021	0.0190186
	c	captoril challenge test (CCT)	6	0.249434	0.137931	0.290737	0.170789	0.0445036
	d	furosemide upright test (FUT)	12	0	0	0.0146722	0.0447585	0.0490681
	e	ACTH stimulation test (AST)	15	0.061777	0.172414	0.0738074	0.121319	0.101179
C	a	blood counts	13	0	0	0.0227759	0.0259128	0.0562952
	b	hepatic function	4	0	0	0.0121422	0	0.00874857
	c	renal function	2	0	0	0.00465356	0	0.0121719
	d	lipid profile	3	0.0251938	0	0.00585351	0	0.0346139
	e	glucose metabolism	8	0	0	0.00617134	0.0188457	0.0262457
	f	others	4	0	0	0.0105242	0	0.0190186
	g	24h urine ohters	3	0	0	0.0104404	0.0518257	0.022442
D	a	metabolite	63	0	0.172414	0.146638	0.254417	0.260175
	b	total of metabolites	13	0	0	0.0207831	0.0600707	0.0639026
	c	ratio of metabolite	13	0.0528213	0.172414	0.0405122	0.0435807	0.0764549
		Methods of evaluation		Regression coefficient	Permutation importance	Feature importance	Permutation importance	Permutation importance

## Sheet: Table3A
Random Forest	Category	Feature importance
CCT90-PAC	B	0.21203
tumor size	A	0.144915
A/C ratio at 8:00	B	0.0497183
AST120-A/C ratio	B	0.0409084
CCT90-ARR	B	0.0393562
K	A	0.0356817
18OHTHA	D	0.0195532
CCT90-ARC	B	0.0157667
CCT90 FI-ARC	B	0.0157495
18OHF/(THE+THF)	D	0.015727
24h urinary Aldo	A	0.0127734
PAC at 8:00	B	0.0119549
ARR at 8:00	B	0.0116351
BNP	A	0.0113863
5αTHB	D	0.0109196
THDOC	D	0.0108821
AST120-PAC	B	0.00943254
17OHP5	D	0.00896408
18OHF	D	0.00812698
ARC at first visit	A	0.00755867
IntactPTH	A	0.0072551
THAld	D	0.00684663
Urinary C-peptide	C	0.0064812
11oxoEt	D	0.00624269
βTHE/βTHF	D	0.00616776
20αDHE	D	0.00613869
AST	C	0.0060529
24h urinary Cort	A	0.00517564
6βOHF	D	0.0051513
PAC at 24:00	B	0.00495086
amylase	C	0.00490703
TC	C	0.00489859
CCT90 FI-ARR	B	0.00480337
DHEA	D	0.00477758
total 11OHB	D	0.00458739
neutrophil	C	0.00452835
5α/5β17OHPnan	D	0.00452643
AT5	D	0.0041815
cortisol at 16:00	B	0.00416289
Ald	D	0.00409343

## Sheet: Table3B
Logistic Regression	Category	Regression coefficient
tumor size	A	0.424471
CCT90-PAC	B	0.249434
K	A	0.15111
AST120-A/C ratio	B	0.0605525
18OHF/(THE+THF)	D	0.0528213
IntactPTH	A	0.0273253
HDL-C	C	0.0251938
sex	A	0.0078676
AST30-cortisol	B	0.00122449

## Sheet: Table3C
Multilayer Perceptron	Category	Permutation importance
αTHF/βTHF	D	0.0228224
24h urinary Aldo	A	0.0201598
24h urinary Aldo	A	0.0201598
MCHC	C	0.0197794
18OHF/(THE+THF)	D	0.019399
Urinary C-peptide	C	0.0186383
CCT90-ARC	B	0.0174971
AST30 FI-PAC	B	0.0171168
20αCtl	D	0.016356
PAC at 24:00	B	0.0159757
total 11OHB	D	0.0155953
18OHF	D	0.0148345
20αCor	D	0.0148345
CCT90 FI-ARR	B	0.0144542
Hb	C	0.0140738
5αTHA	D	0.0140738
BNP	A	0.013313
5βTHB	D	0.013313
total F	D	0.0129327
AST120-A/C ratio	B	0.0125523
5βTHA	D	0.0121719
HDL-C	C	0.0121719
THDOC	D	0.0117916
LDL-C	C	0.0114112
PAC 24:00/8:00 ratio	B	0.0114112
AST60 FI-PAC	B	0.0114112
HR	A	0.0110308
TC	C	0.0110308
5β17OHPnan	D	0.0110308
total A	D	0.0110308
sex	A	0.0110308
CK	C	0.0106504
AST30 FI-cortisol	B	0.0106504
6βOHF	D	0.0106504
16PT5	D	0.0102701
post CPI	C	0.00988969
AST120 FI-PAC	B	0.00950932
ARR at 8:00	B	0.00950932
AST120-PAC	B	0.00912895
K	A	0.00912895

[truncated: 4 more sheets: SupplementaryTable1, SupplementaryTable2, SupplementaryTable3A, SupplementaryTable3B]
