# Supplementary material for: Machine Learning Approach for Subtype Prediction in Primary Aldosteronism: A Comprehensive Analysis of Models and Features
Source: Research Square preprint supplement (doi:10.21203/rs.3.rs-8268064/v1), 2025-12-15
Supplement: Supplementary file 2 [file a53f9ea1e14af04b40f64c19.docx]

**Machine Learning Approach for Subtype Prediction in Primary Aldosteronism: A Comprehensive Analysis of Models and Features.**

Yosuke Mizutani, Kazutoshi Miyashita, Toshifumi Nakamura, Jumpei Nagase,

Masato Nishihara, Keiko Honma, Terumichi Nakagawa, Hiromichi Matsushita,

Kenichiro Kinouchi, Hiroshi Itoh, Kaori Hayashi

***Supplementary Materials***

**・Extended Methods**

**・Supplementary Tables 1 to 3**

**・Legends for Supplementary Figures**

**◆ Please refer to the TableData Excel file for details of Supplementary Tables,**

**Extended Methods**

**Precise methods of patient assessment**

All patients (n=274, Supplementary Figure 1) underwent inpatient evaluation, including blood sampling for hormone profiles at 8:00, 16:00, and 24:00; 24-hour urine collection; endocrine challenge tests; and adrenal venous sampling (AVS). Confirmatory testing included the captopril challenge test (CCT), furosemide upright test (FUT), and ACTH stimulation test (AST). A positive CCT was defined as an aldosterone–renin ratio (ARR) ≧40 or PAC ≧120 at 90 minutes after 50 mg oral captopril. Patients testing positive on the CCT were diagnosed with primary aldosteronism (PA). The saline infusion test (SIT) was not performed in this study. Thin-slice abdominal computed tomography (CT) was used to detect adrenal tumors, and tumor size was measured. PA subtype was determined by ACTH-stimulated AVS, with the diagnosis of unilateral PA (uPA) based on consensus criteria [11,12]: a lateralization ratio (LR) ≧4.0 after ACTH stimulation or LR ≧2.5 with a contralateral ratio (CR) <1. Patients meeting these criteria were classified as uPA (n=79), and all others as bilateral PA (bPA; n=195). PAC and active renin concentration (ARC) were measured using commercial immunoassays. PAC was measured via radioimmunoassay (RIA) with the SPAC-S Aldosterone Kit (Fuji Rebio, Tokyo, Japan) from January 2013 to October 2015 and the Accuraseed Aldosterone Kit (Fujifilm Wako, Tokyo, Japan) from November 2015 to December 2019. ARC was measured using the Renin IRMA-FR Kit (Fuji Rebio) and the Accuraseed Renin Kit (Fujifilm Wako) during the respective periods. Urinary steroid profile (Category D) included 63 steroid metabolites corresponding to 23 circulating steroids, analyzed by hydrolysis, extraction, derivatization, and gas chromatography-mass spectrometry (GC-MS). Details of steroid profile are shown in Supplementary Figure 2. Metabolite sums and ratios were also included in features of Category D.

The abbreviations, full descriptions and index numbers are provided in Supplementary Table 1. Medians, interquartile ranges, and p-values for all 196 features are shown in Supplementary Table 2. Two-sample t-tests were run on all 196 features to obtain unadjusted p-values as indicators of candidate predictors.

**Precise methods for development of machine learning-based prediction models**

Prediction models were developed and validated using Python 3.11, scikit-learn 1.5.0, and LightGBM 4.4.0. Five machine learning algorithms were used: LR, SVM, RF, GBDT, and MLP. The training dataset (n=205) was used for model development, and the test dataset (n=69) for prediction. Missing values were imputed by stratifying patients into eight groups defined by age quartiles (4 groups) × sex (2 groups), then replacing missing entries with the respective group means. Hyperparameters were optimized using grid search with four-fold cross-validation (Supplementary Tables 3A and B). The models output probability scores (0 to 1) for classifying uPA, with a threshold of 0.5.

**Evaluation of predictive performance of machine learning-based models**

Prediction performance was assessed using five metrics: LogLoss, ROC-AUC, accuracy, sensitivity, and specificity. LogLoss evaluates probabilistic accuracy (lower is better), while ROC-AUC measures ranking quality (closer to 1 is better). Accuracy reflects the proportion of correct classifications. Low specificity implies risk of bPA being misclassified as uPA (type I error), leading to overdiagnosis, while low sensitivity may miss uPA (type II error), risking undertreatment. Reliable models show low LogLoss and high ROC-AUC and accuracy.

**Evaluation of predictive contributions of features and categories**

Predictive contributions of features were assessed using model-appropriate metrics: regression coefficients (LR), feature importance (RF), or permutation importance (SVM, GBDT, MLP). All metrics were normalized to sum to 1. Category and subcategory contributions were calculated by summing the respective feature contributions. These metrics are widely used in machine learning for feature evaluation.

**Overview of five machine learning models**

LR applies the logistic function to linear regression outputs, enabling binary classification with outputs between 0 and 1. SVM also produces values in this range but uses kernel methods to define nonlinear decision boundaries, improving classification in complex datasets. RF is an ensemble model combining multiple decision trees generated through recursive partitioning. It provides good interpretability via feature importance metrics. GBDT, implemented using LightGBM, builds trees sequentially by focusing on previously misclassified samples, often improving accuracy over RF. MLP, a neural network, is a deep learning model suited for structured data. Although deep learning offers powerful modeling capacity with many parameters, its interpretability is limited compared to other models. Each model provides unique advantages and was selected to compare both predictive performance and feature contribution.

**Supplementary Tables**

**Supplementary Table 1. Index IDs, abbreviations, and full descriptions of the 196 features**

A complete list of 196 features used in the model development, including their index IDs, abbreviations, and corresponding full descriptions.

**◆ Please refer to the TableData Excel file for details of Supplementary Table 1.**

**Supplementary Table 2. A comprehensive list of key data for all 196 features, sorted by ID**

The medians, interquartile ranges (25th–75th percentiles. IQR), p-values, and predictive contributions of each feature in PA subtype prediction, as analyzed by each machine learning-based model.

**◆ Please refer to the TableData Excel file for details of Supplementary Table 2.**

**Supplementary Table 3. Model development using the training dataset**

A) The optimized hyperparameters identified through grid search for machine learning–based models trained on all 196 features, along with the diagnostic accuracy evaluated on the training dataset (n=205), which may achieve relatively higher value due to evaluation on the same data used for training. Green background indicates the model that achieved the highest performance on the training dataset.

B) The optimized hyperparameters identified through grid search for machine learning–based models trained on features of each Category, along with their diagnostic accuracy on the training dataset (n=205). Green background indicates the combination of Categories that achieved highest ROC-AUC and diagnostic accuracy. Retrospectively, the high values in MLP were judged to be due to overfitting.

**Legends for Supplementary Figures**

**Supplementary Figure 1. Flowchart of patient inclusion**

The patient inclusion process from the initial cohort to the final analysis dataset.

**Supplementary Figure 2. Metabolites for urinary steroid profile (Category D)**

The pathways for urinary steroid metabolites analyzed by GC-MS, corresponding to Category D.
